# Supplementary material
Source: PubMed Central journal article supplement (PMC1747159)

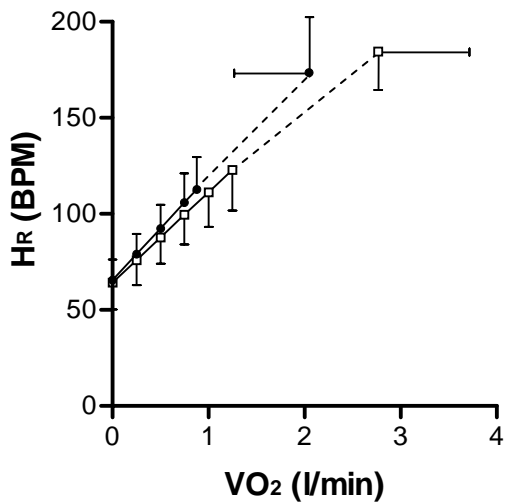

Supplement: thorax_60_1_32__2.pdf [file thorax_60_1_32__2.pdf]
